# Supplementary material for: Induced Regulatory T Cells Superimpose Their Suppressive Capacity with Effector T Cells in Lymph Nodes via Antigen-Specific S1p1-Dependent Egress Blockage
Source: PubMed Central journal article supplement (PMC5461288; doi:10.3389/fimmu.2017.00663), 2017-06-07
Supplement: image_1.pdf [file image_1.pdf]

*Supplementary Material*

**Induced regulatory T cells superimpose their suppressive capacity with  
effector T cells in lymph nodes via antigen specific S1p1-dependent  
egress blockage**

Shuang Geng<sup>1</sup>, Yiwei Zhong<sup>1</sup>, Xiaoyu Zhou<sup>1</sup>, Gan Zhao<sup>1</sup>, Xiaoping Xie<sup>2</sup>, Yechun Pei<sup>2</sup>, Hu Liu<sup>2</sup>, Huiyuan Zhang<sup>†</sup>, Yan Shi<sup>3\*</sup> & Bin Wang<sup>1,\*</sup>

**\*Corresponding authors**

Dr. Bin Wang, [bwang3@fudan.edu.cn](mailto:bwang3@fudan.edu.cn);

or Dr. Yan Shi, [yanshi@biomed.tsinghua.edu.cn](mailto:yanshi@biomed.tsinghua.edu.cn).

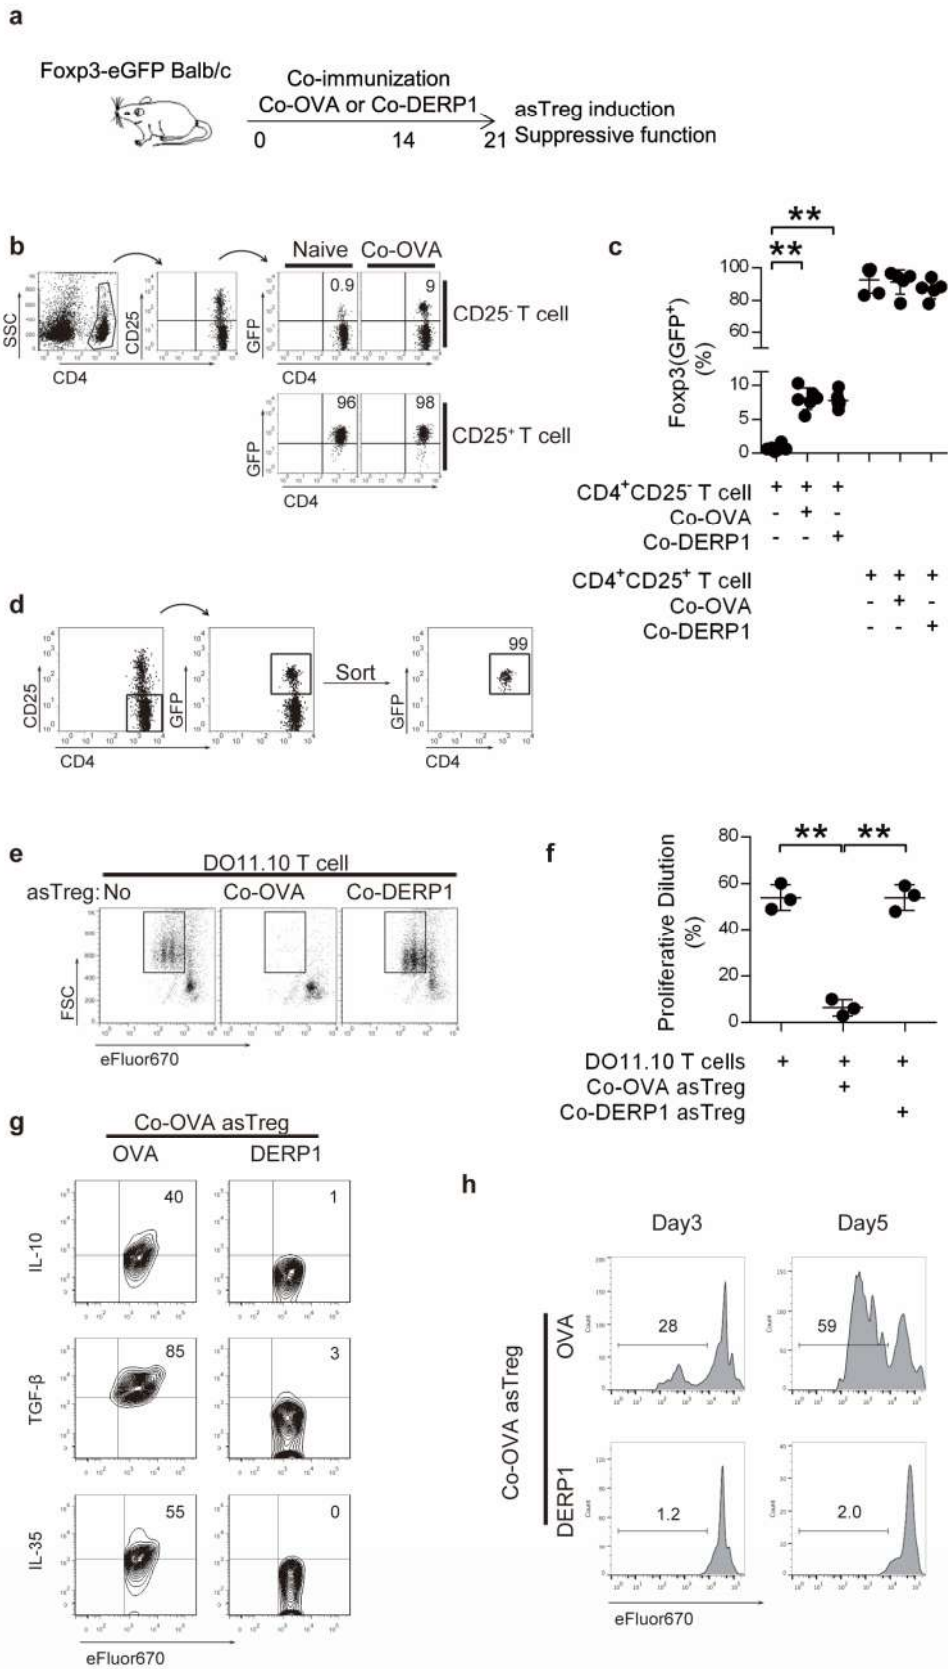

### Supplementary Figure 1. Co-immunization induce functional CD25<sup>-</sup> asTregs

(a) Naïve Foxp3-eGFP transgenic mice were co-immunized with Co-OVA on day -21 and -7, phenotypical and function analyses were performed on day 0. (b) asTreg induction by co-immunization. Naïve mice splenocytes were stained as control. (c) Statistical analysis of asTreg induction. n=5. (d) Sorting efficiency of CD25<sup>-</sup> asTreg is routinely >98%. (e) Suppressive function of asTregs *in vitro*. DO11.10 CD4<sup>+</sup> splenocytes were purified and labeled with eFluor670, then *in vitro* stimulated with OVA presented by DCs for 3 days. Negative control was set up without asTreg co-culture. (f) Statistical analysis of *in vitro* suppression experiment. n=3. (g) FACS data of asTreg cytokine secretions after *in vitro* restimulation. (h) Proliferation of asTregs after *in vitro* restimulation. Data shown represent 3 independent experiments.

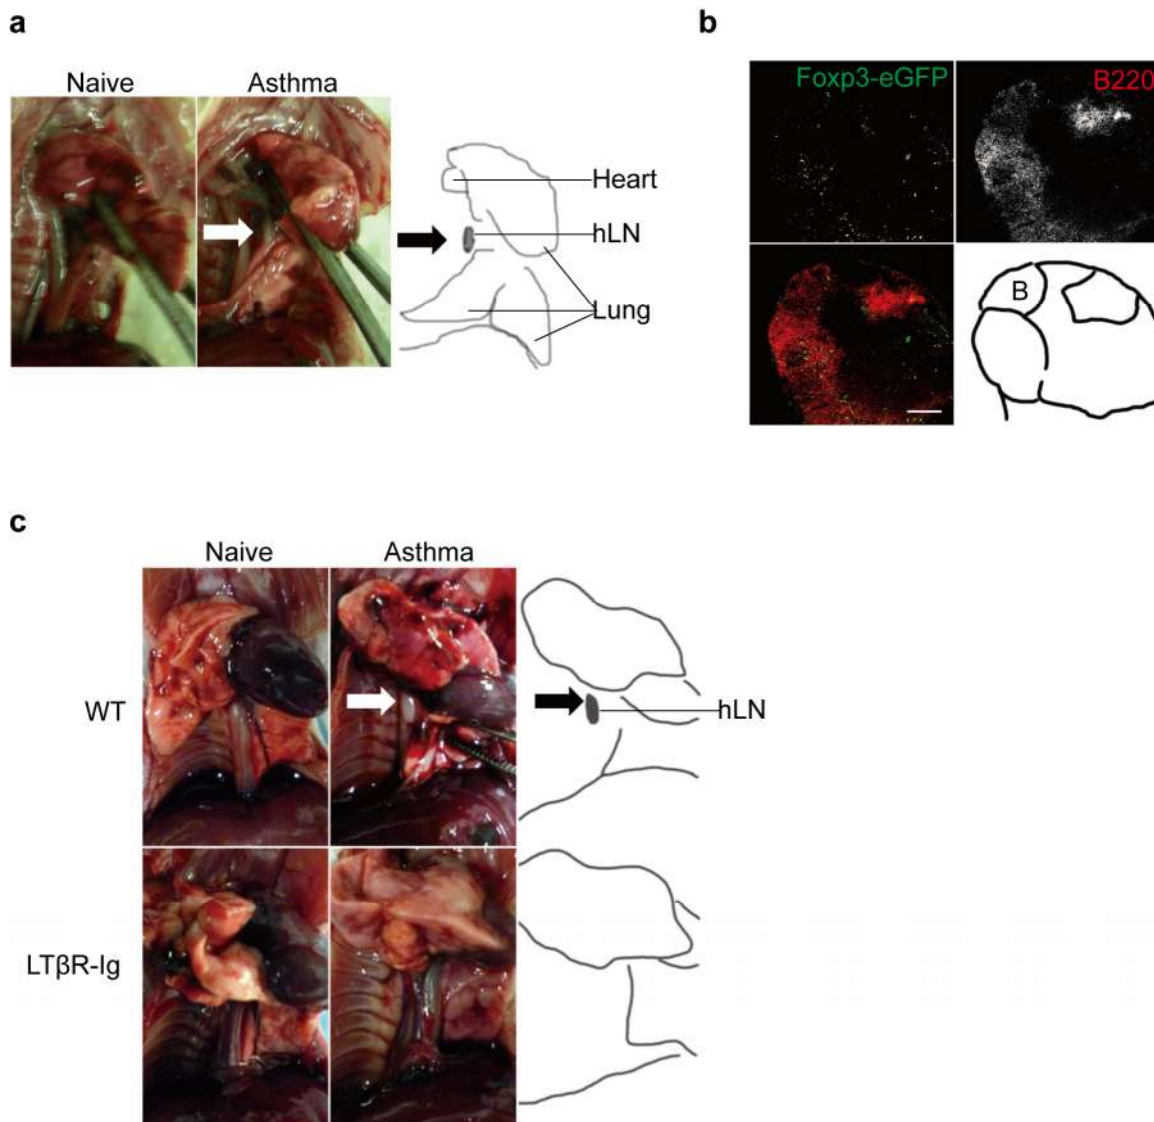

### Supplementary Figure 2. Hilar lymph node anatomy and ablation

(a) Physical location of lung-draining hilar lymph node (hLN). Naïve mice have no visible hLN, whereas asthmatic mice showed expanded hLN 1~3mm in diameter. (b) asTreg distribution within hLN. Cryo-sections of hLN were stained for B220. 200 $\mu$ m scale. (c) Maternal LT $\beta$ R-Ig injection ablates hLN (lower-right).

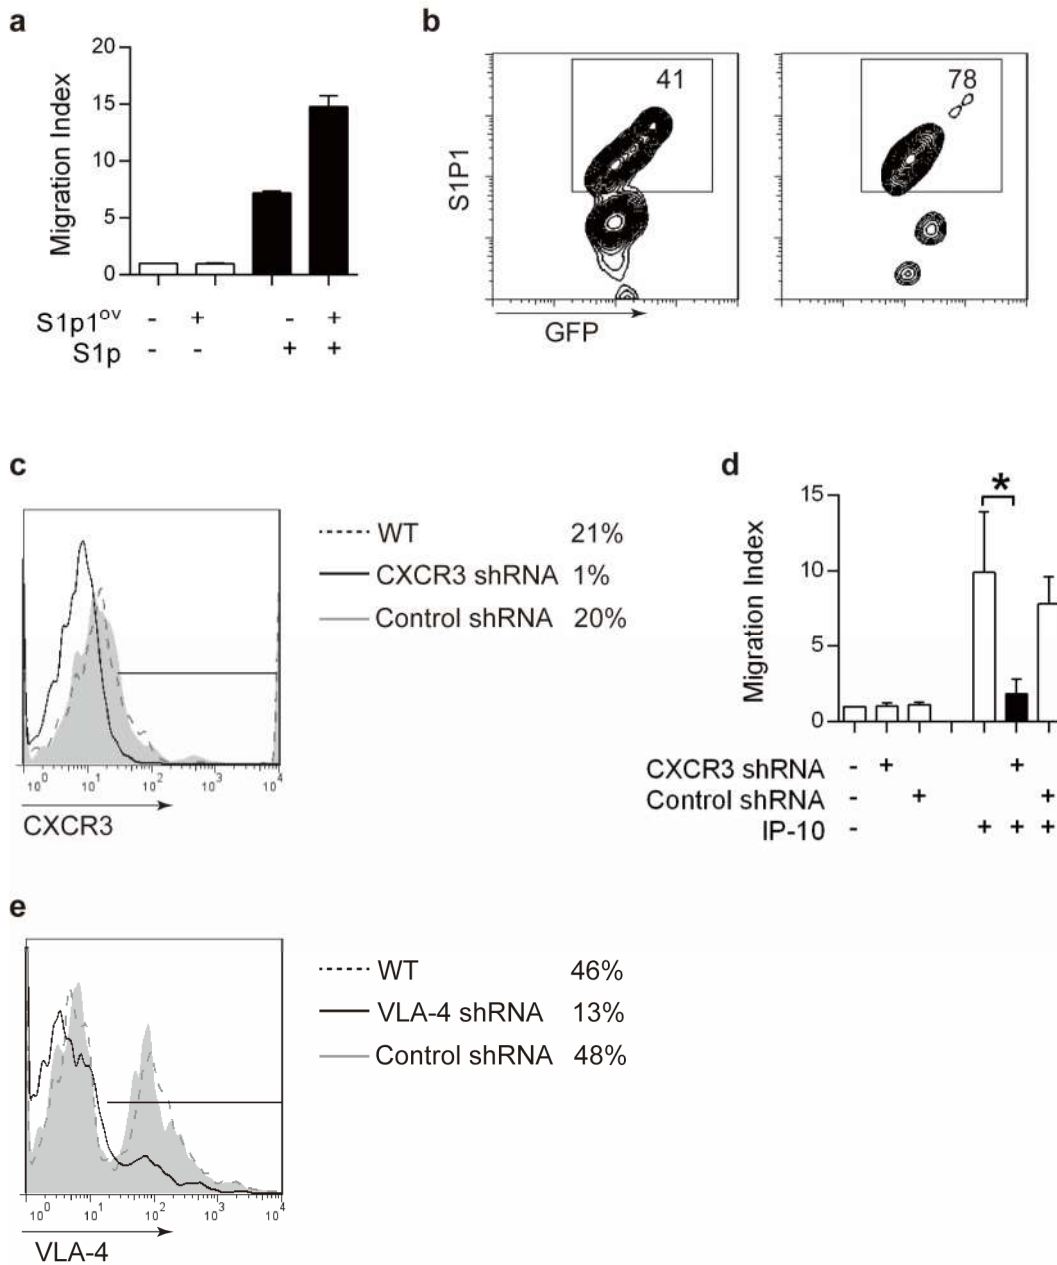

### Supplementary Figure 3. S1p1 over-expression, and CXCR3 and VLA-4 knock-down

**(a-b)** Sorted asTregs were transfected with lentivirus coding S1p1 gene. **(a)** S1p chemotaxis of donor cells. WT or S1p1 over-expressing (S1p1<sup>ov</sup>). **(b)** S1P1 expression before (left) and after (right) overexpression. n=3. **(c-e)** Donor inflammatory DO11.10 Teff cells were transfected with lentivirus coding CXCR3, VLA-4 or control shRNA. **(c)** CXCR3 surface stain of the transfected donor cells. **(d)** IP-10 induced transwell of transfected donor cells. n=3. **(e)** VLA-4 surface stain of transfected donor cells. n=3. Data shown represented 3 independent experiments.

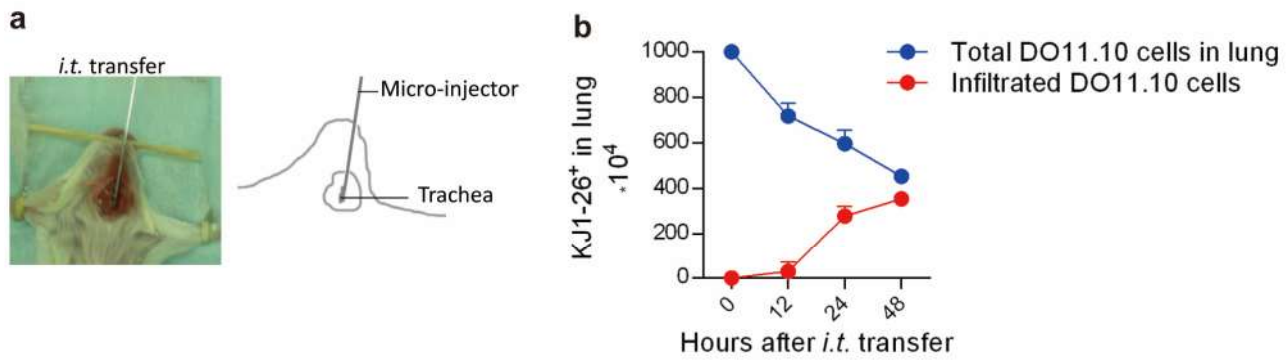

#### Supplementary Figure 4. Intra-tracheal transfer of inflammatory DO11.10 cells

(a) Surgical procedure of intra-tracheal (*i.t.*) transfer.  $10^7$  donor cells were injected into recipient lung in 50  $\mu$ l PBS with micro-injector. Detailed information is provided in Materials and Methods.

(b) Different time points after *i.t.* transfer, lungs were perfused by cardiac PBS perfusion to remove blood. Non-infiltrated cells were defined as those cells could be washed out in bronchoalveolar lavage (BAL). Infiltrating cells (red) were defined as those cells remained after 3-time BAL washing. Total cells were shown (blue).  $n=3$ . Data shown represent 3 independent experiments.

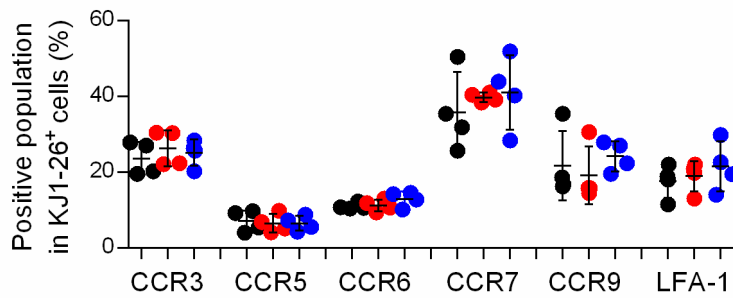

**Supplementary Figure 5. Chemokine receptor and adhesion molecule phenotype on DO11.10 inflammatory donor cells in hLN**

Experimental scheme for inflammatory infiltration is the same as Fig. 5. Both antigen-matched treatment (Co-OVA, red) and mismatched (Co-DERP1, blue) by asTregs were performed on OVA asthmatic recipient mice. PBS sham-treatment recipient mice were compared as control (black dot). CCR3, CCR5, CCR6, CCR7, CCR9 and LFA-1 expression on donor inflammatory DO11.10 T cells in hLN at day 10. n=4. Data shown represent 2 independent experiments.
